# Supplementary material
Source: publisher figshare collection journal article supplement (https://tandf.figshare.com/ndownloader/files/12419405)
Supplement: Supplementary file 1 [file 12419405]

**Electronic supplementary material (ESM) Table**

ESM Table 1: The primers for real-time QPCR

| Gene | Forward or Reverse | Primer sequence |
| --- | --- | --- |
| ZEB1-AS1 | Forward | 5’- CCG TGG GCA CTG CTG AAT -3’ |
| Reverse | 5’- CTG CTG GCA AGC GGA ACT -3’ |
| ZEB1-AS1-  siRNA-1 | Forward | 5’- CCG GAA GCA CAG TGG TCT AAA AGT ACT CGA GTA CTT TTA GAC CAC TGT GCT TTT TTT G -3’ |
| ZEB1-AS1-  siRNA-2 | Forward | 5’-CCG GCT GTA GAA GGTT GAA GGG AAA CTC GAG TTT CCC TTC AAC CTT CTA CAG TTT TTG -3’ |
| Control-siRNA | Forward | 5’-UUC UCC GAA CGU GUC ACG UTT ACG UGA CAC GUU CGG AGA ATT-3’ |
| MALAT1 | Forward | 5’- TGG TAG TGT GTG TGG TTC TCT TTG -3’ |
| Reverse | 5’- CTT TTC GCT TTT ATT CTG CTT TTG -3’ |
| GAPDH | Forward  Reverse | 5’- GGG AGC CAA AAG GGT CAT -3’ |
| 5’- GAG TCC TTC CAC GAT ACC AA -3’ |
| miR-181a-5p mimics | Forward | 5’- AAC AUU CAA CGC UGU CGG UGA GU -3’ |
| Reverse | 5’- UCA CCG ACA GCG UUG AAU GUU GU -3’ |
| mimics control | Forward | 5’- UUC UCC GAA CGU GUC ACG UTT -3’ |
| Reverse | 5’- ACG UGA CAC GUU CGG AGA ATT -3’ |
| miR-181a-5p inhibitor | Forward | 5’-ACU CAC CGA CAG CGU UGA AUG UU -3’ |
| inhibitor  control | Forward | 5’- CAG UAC UUU UGU GUA GUA CAA  -3’ |
| U6 snRNA | Forward | 5’-ACG CAA ATT CGT GAA GCG TT-3’ |

Notes: si#1, ZEB1-AS1-siRNA-1; si#2, ZEB1-AS1-siRNA-2
